# Supplementary material for: MUC2 mucin deficiency alters inflammatory and metabolic pathways in the mouse intestinal mucosa
Source: PubMed Central journal article supplement (PMC5641062; doi:10.18632/oncotarget.16886), 2017-04-06
Supplement: oncotarget-08-71456-s001.pdf [file oncotarget-08-71456-s001.pdf]

## MUC2 mucin deficiency alters inflammatory and metabolic pathways in the mouse intestinal mucosa

### Supplementary Materials

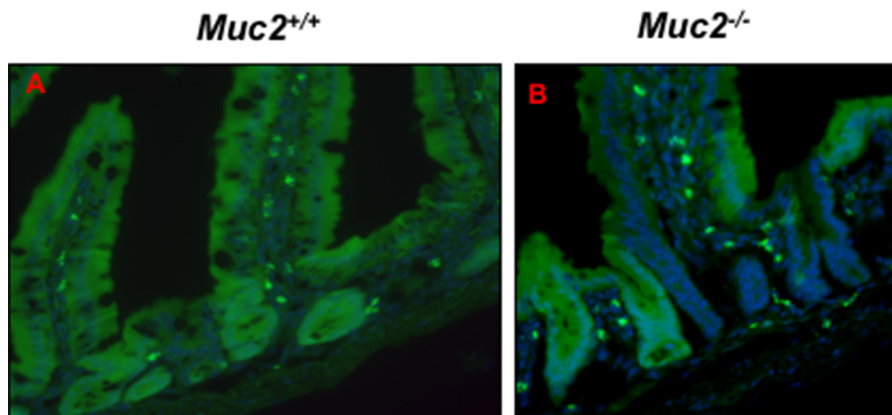

**Supplementary Figure 1: ROS producing cell detection in WT and *Muc2*<sup>-/-</sup> mice.** Tissue was probed by immunofluorescent detection of oxidized DCF. Magnification 400 ×

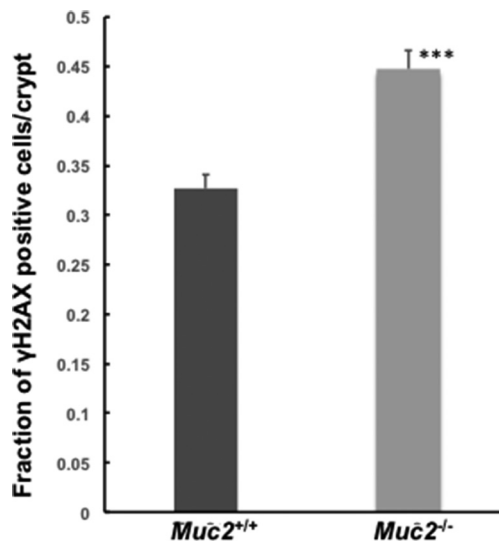

**Supplementary Figure 2: Increased number of  $\gamma$ H2AX positive cells in *Muc2*<sup>-/-</sup> crypts.** Quantification of  $\gamma$ H2AX-positive cells in sections from *Muc2*<sup>+/+</sup> and *Muc2*<sup>-/-</sup> mice. The number of  $\gamma$ H2AX-positive cells was determined in tissue sections incubated with anti  $\gamma$ H2AX-antibodies, as shown in Figure 2.

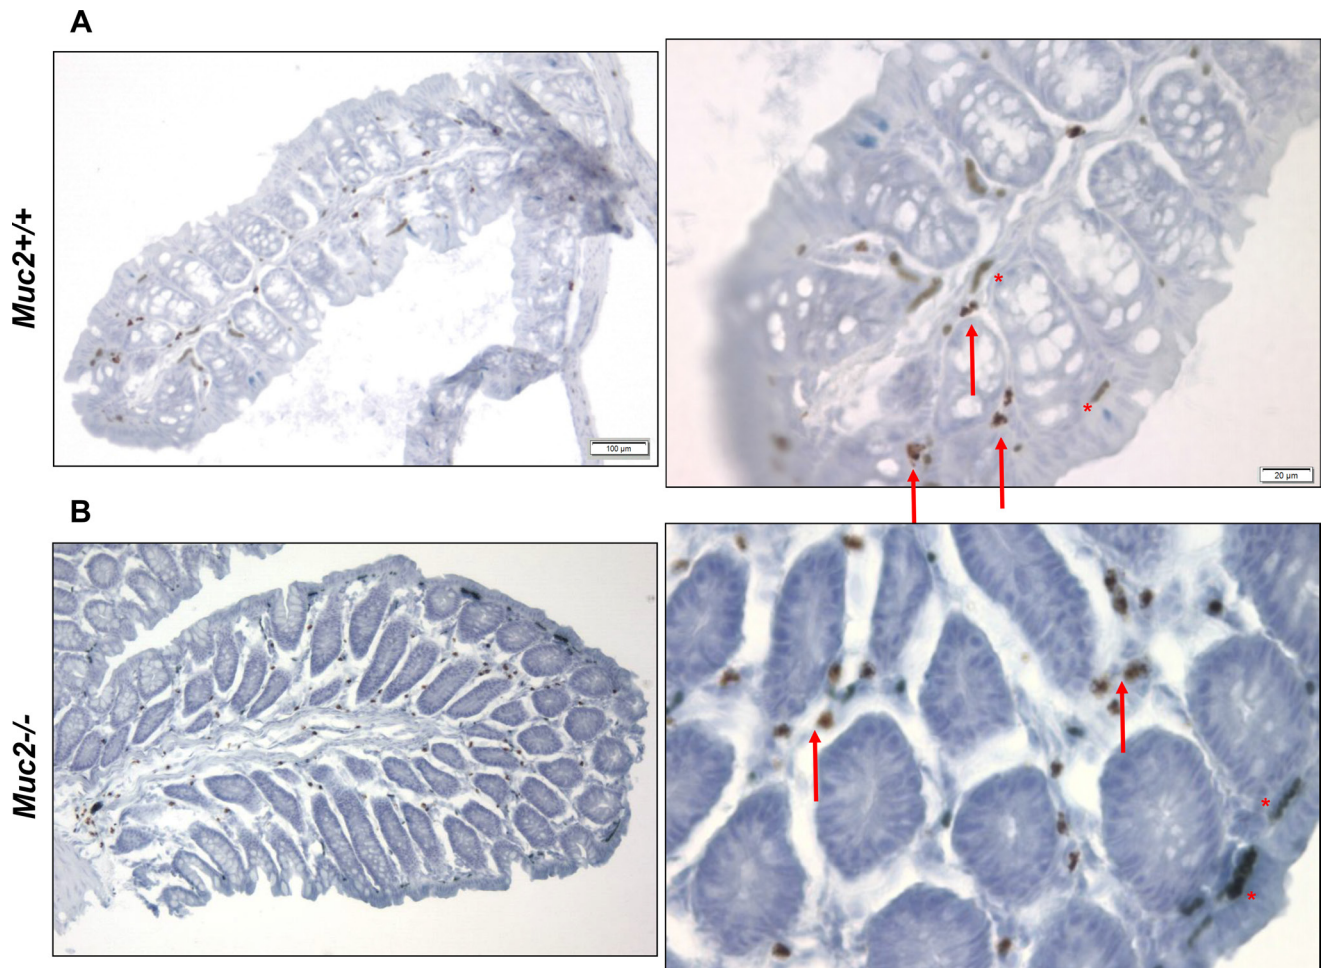

**Supplementary Figure 3: Increased number of ROS positive cells in the colon of *Muc2*<sup>-/-</sup> mice.** Representative micrographs of frozen sections of flat mucosa of colon from 3 month old *Muc2*<sup>+/+</sup> (A) and *Muc2*<sup>-/-</sup> (B) mice, respectively, incubated *in vitro* with DAB, as described in Material and Methods. Red arrows indicate cell positivity due to DAB polymerization in the presence of cell-generated H<sub>2</sub>O<sub>2</sub>. Red asterisks indicate red blood cells.
